# Supplementary material
Source: Springer Nature journal article supplement (https://www.springermedizin.de/resource/supplementary/13000_2014_943_MOESM1_ESM.pdf/9625790)
Supplement: MOESM1 [file 9625790]

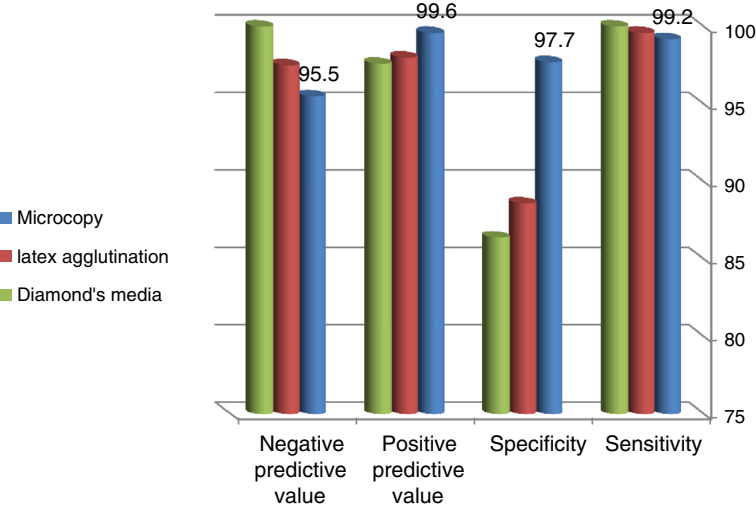

Microcopy  
latex agglutination  
Diamond's media

Negative predictive value

Positive predictive value

Specificity

Sensitivity

95.5

99.6

97.7

99.2

100  
95  
90  
85  
80  
75
